# Supplementary material for: Increased Resistance to Biotrophic Pathogens in the Arabidopsis Constitutive Induced Resistance 1 Mutant Is EDS1 and PAD4-Dependent and Modulated by Environmental Temperature
Source: PubMed Central journal article supplement (PMC4193848; doi:10.1371/journal.pone.0109853), 2014-10-10
Supplement: pone.0109853.s001.pdf [file pone.0109853.s001.pdf]

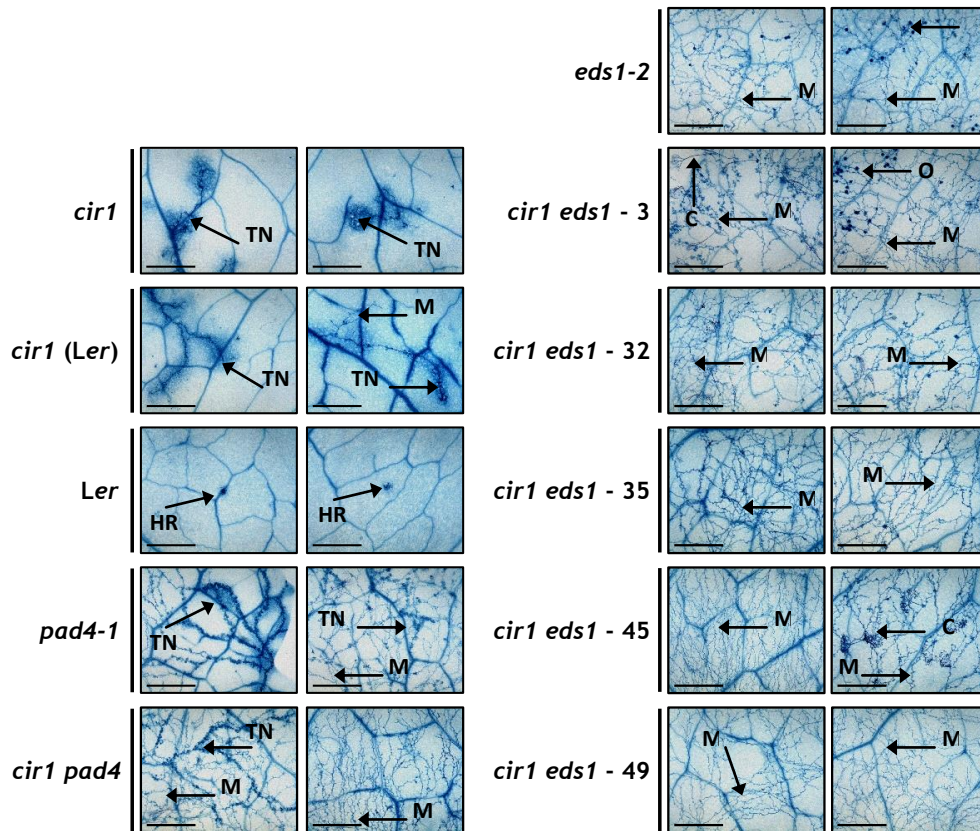

**Figure S1.** Trypan blue-stained leaf tissue of four-week-old plants six days post-infection with *Hyaloperonospora arabidopsidis* Noco2. Conidiophores (C), hypersensitive response (HR), mycelium (M), oospores (O) or trailing necrosis (TN) are indicated. Scale bars indicate a distance of 0.5 mm.
