# Supplementary material for: Increased Resistance to Biotrophic Pathogens in the Arabidopsis Constitutive Induced Resistance 1 Mutant Is EDS1 and PAD4-Dependent and Modulated by Environmental Temperature
Source: PubMed Central journal article supplement (PMC4193848; doi:10.1371/journal.pone.0109853), 2014-10-10
Supplement: pone.0109853.s002.pdf [file pone.0109853.s002.pdf]

| Gene                                    | Primer sequence or source and final concentration used in qPCR (nM) | Annealing temp (°C) | Amplicon size (bp) |
|-----------------------------------------|---------------------------------------------------------------------|---------------------|--------------------|
| At3g18780 ( <i>Actin-2</i> )            | AGTGGTCGTACAACCGGTATTGT (900)<br>CATGAGGTAATCAGTAAGGTCACGT (300)    | 60                  | 138                |
| At3g48090 ( <i>EDS1</i> )               | GGTACAGTCGATGGGAAAGAAG (200)<br>GTGCTCACTCCAAGGTCATT (200)          | 60                  | 87                 |
| At2g14160 ( <i>PR-1</i> )               | CATGGGACCTACGCCTACC (900)<br>TTCTTCCCTCGAAAGCTCAA (300)             | 60                  | 92                 |
| At4g16890 ( <i>SNC1</i> )               | GCTCGCCGACTTTACAGACT (200)<br>GGAAGATGATACAACCTTATCCCAGA (200)      | 60                  | 141                |
| At2g31880 ( <i>suppressor of BIR1</i> ) | Arabidopsis pathogen-inducible genes primer library (200)           | 65                  | 159                |

**Table S1.** Primers used in quantitative PCR experiments. Final concentration and annealing temperature used in qPCR and resulting amplicon size are shown. The Arabidopsis pathogen-inducible genes primer library was obtained from Sigma-Aldrich (product number P01000).
