# Supplementary material for: Increased Resistance to Biotrophic Pathogens in the Arabidopsis Constitutive Induced Resistance 1 Mutant Is EDS1 and PAD4-Dependent and Modulated by Environmental Temperature
Source: PLoS One. 2014 Oct 10;9(10):e109853. doi: 10.1371/journal.pone.0109853 (PMC4193848; doi:10.1371/journal.pone.0109853)
Supplement: Table S2 — Data used to generate Figures 1 , 2 , 3 , 4B , 6 and 7 . (XLSX) [file pone.0109853.s003.xlsx]

## Sheet: Figure 1
Pst DC3000 counts in cir1, cir1 (Ler), eds1-2, eds1 cir1, pad4 and pad4 cir1 48 hpi
Genotype	Biol Replicate	Colonies per cm2 leaf area	mean	SD	SEM
cir1	1	2400000
cir1	2	2.53333e+06
cir1	3	2.33333e+06	2.42222e+06	101835	58794.5
cir (Ler)	1	6.66667e+06
cir (Ler)	2	6.66667e+06
cir (Ler)	3	666667	4.66667e+06	3.4641e+06	2e+06
eds1-2	1	1.93333e+08
eds1-2	2	180000000
eds1-2	3	1.13333e+08	1.62222e+08	4.28607e+07	2.47456e+07
cir1 eds1 A	1	160000000
cir1 eds1 A	2	1.13333e+08
cir1 eds1 A	3	1.53333e+08	1.42222e+08	2.52396e+07	1.45721e+07
cir1 eds1 B	1	1.53333e+08
cir1 eds1 B	2	160000000
cir1 eds1 B	3	1.06667e+08	1.4e+08	2.90593e+07	1.67774e+07
cir1 eds1 C	1	180000000
cir1 eds1 C	2	1.53333e+08
cir1 eds1 C	3	1.66667e+08	1.66667e+08	1.33333e+07	7.698e+06
cir1 eds1 D	1	1.93333e+08
cir1 eds1 D	2	1.86667e+08
cir1 eds1 D	3	180000000	1.86667e+08	6.66667e+06	3.849e+06
cir1 eds1 E	1	220000000
cir1 eds1 E	2	2.13333e+08
cir1 eds1 E	3	200000000	2.11111e+08	1.01835e+07	5.87945e+06
pad4 -1	1	28000000
pad4 -1	2	32000000
pad4 -1	3	3.33333e+07	3.11111e+07	2.77555e+06	1.60247e+06
cir1 pad4	1	3.13333e+07
cir1 pad4	2	3.33333e+07
cir1 pad4	3	3.26667e+07	3.24444e+07	1.01835e+06	587945

## Sheet: Figure 2
H. arabidopsidis spore counts in cir1, cir1 (Ler), Ler, eds1-2, eds1 cir1, pad4-1 and pad4 cir1 7 dpi
Genotype	Biol Replicate	Spores/g plant tissue	Mean	SD	SEM
cir1	1	49757.8
cir1	2	49757.8
cir1	3	18038.8
cir1	4	36077.6	38408	15033	7516.49
cir1 (Ler)	1	39767.8
cir1 (Ler)	2	39767.8
cir1 (Ler)	3	18175.2
cir1 (Ler)	4	18175.2	28971.5	12466.5	6233.23
Ler	1	10285.1
Ler	2	0
Ler	3	0
Ler	4	0	2571.28	5142.55	2571.28
eds1-2	1	713824
eds1-2	2	740761
eds1-2	3	573602
eds1-2	4	613855	660510	79607.8	39803.9
cir1 eds1 A	1	458460
cir1 eds1 A	2	458460
cir1 eds1 A	3	706490
cir1 eds1 A	4	657767	570294	130658	65329.1
cir1 eds1 B	1	541360
cir1 eds1 B	2	469179
cir1 eds1 B	3	671241
cir1 eds1 B	4	745823	606901	124769	62384.7
cir1 eds1 C	1	641694
cir1 eds1 C	2	721906
cir1 eds1 C	3	660502
cir1 eds1 C	4	763705	696952	56156.8	28078.4
cir1 eds1 D	1	661530
cir1 eds1 D	2	836641
cir1 eds1 D	3	747742
cir1 eds1 D	4	777651	755891	72948.5	36474.3
cir1 eds1 E	1	704287
cir1 eds1 E	2	781319
cir1 eds1 E	3	770833
cir1 eds1 E	4	458333	678693	150815	75407.4
pad4-1	1	252095
pad4-1	2	224085
pad4-1	3	176157
pad4-1	4	165147	204371	40827.9	20413.9
cir1 pad4	1	191393
cir1 pad4	2	236427
cir1 pad4	3	209400
cir1 pad4	4	224357	215394	19448.1	9724.06

## Sheet: Figure 3
Relative PR-1 and SOBIR expression in Col, cir1, pad4-1, cir1 pad4, eds1-2 and cir1 eds1 plants
Genotype	Biol Repl	Actin calc conc	PR1 calc conc	PR1/Act	Mean	SD		SOBIR calc conc	SOBIR/Act	Mean	SD
Col	1	114.768	2.17857	0.0189824				31.0882	0.270879
	2	82.4222	0.879567	0.0106715	0.0148269	0.00587668		36.6655	0.44485	0.357864	0.123016
Col + Pst	1	52.7172	108.956	2.06679				176.798	3.35371
	2	68.9075	317.134	4.60231	3.33455	1.79288		135.549	1.96711	2.66041	0.980476
cir1	1	97.134	427.899	4.40524				253.751	2.61238
	2	108.765	491.65	4.52029	4.46277	0.0813539		354.126	3.25588	2.93413	0.455026
pad4-1	1	78.4344	0.922533	0.0117618				27.6342	0.352323
	2	60.963	0.514167	0.00843408	0.010098	0.00235309		34.0087	0.557858	0.45509	0.145335
cir1 pad4	1	120.634	0.946	0.0078419				16.4544	0.136399
	2	96.085	0.4838	0.00503513	0.00643851	0.00198469		19.4458	0.202381	0.16939	0.0466562
eds1-2	1	163.423	0.8441	0.00516512				41.8361	0.255999
	2	98.269	19.5431	0.198874	0.102019	0.136973		52.5654	0.534913	0.395456	0.197222
cir1 eds1	1	121.028	0.841033	0.00694908				26.1004	0.215656
	2	91.501	0.322733	0.0035271	0.00523809	0.0024197		34.9653	0.38213	0.298893	0.117715

## Sheet: Figure 4B
EDS1 relative expression (normalised to Actin2) in cir1 versus PR-1:LUC control plants
Actin2	Biol Repl	Tech Repl	conc	mean conc			EDS1			conc	mean conc		EDS1/Actin2	mean	SD	SEM
PR-1:LUC	1	1	4.70046				PR-1:LUC	1	1	4.93765
		2	4.44529	4.57287					2	5.04208	4.98986		1.09119
	2	1	8.21372					2	1	5.07738
		2	7.93213	8.07293					2	5.00703	5.04221		0.624582
	3	1	4.14572					3	1	8.36883
		2	4.66778	4.40675					2	8.15981	8.26432		1.87538	1.19705	0.632082	0.364933
cir1	1	1	5.40431					1	2	8.93449
		2	5.29237	5.34834			cir1		3	9.12347	9.02898		1.68818
	2	1	5.00507					2	1	8.99705
		2	5.25557	5.13032					2	9.38167	9.18936		1.79119
	3	1	5.25557					3	1	7.6242
		2	5.14671	5.20114					2	8.061	7.8426		1.50786	1.66241	0.14341	0.0827979
Reaction efficiency (*)			1.00905 (* = 10^(-1/m) - 1)				Reaction efficiency (*)			1.00948 (* = 10^(-1/m) - 1)
M			-3.30042				M			-3.29942
R Value			0.99961				R Value			0.99783
R^2 Value			0.99923				R^2 Value			0.99567

## Sheet: Figure 6
Pst DC3000 counts (Colonies per cm2 leaf area 48 hpi) in cir1 verus PR-1:LUC plants grown at 18, 22 or 25 degrees for 4 weeks
Biol Repl	18 degrees			22 degrees			25 degrees
	PR-1:LUC	cir1		PR-1:LUC	cir1		PR-1:LUC	cir1
1	4.07437e+06	50080.8		1.86742e+07	97615		1.69765e+08	7.63944e+08
2	5.00808e+06	82336.2		7.38479e+06	1.17987e+06		3.39531e+08	8.48826e+06
3	1.27324e+07	1.34963e+06		1.40056e+07	9.59174e+06		4.75343e+08	2.88601e+07
4	1.85044e+07	1.10347e+06		5.43249e+06	37348.4		1.24777e+09	1.52789e+08
5	2.05416e+07	46685.4		543249	107801		1.12894e+08	1.86742e+08
6	3.05577e+07	339531		3.07483e+07	3.33467e+07		9.84639e+08	7.13014e+08
7	7.29991e+07	339531		8.66149e+07	692919		1.32417e+08	1.29022e+09
8	848826	1.52789e+06		1.7323e+08	1.90553e+06		1.87591e+08	1.59579e+08
9	4.32901e+06	679061					5.94178e+08	1.73161e+08
10	6.96038e+06							1.443e+09
Mean	1.76556e+07	613136		4.20792e+07	5.86995e+06		4.7157e+08	4.9198e+08
SD	2.15549e+07	580231		5.96659e+07	1.15504e+07		4.05219e+08	5.30519e+08
SEM	6.81625e+06	193410		2.10951e+07	4.08368e+06		1.35073e+08	1.67765e+08

## Sheet: Figure 7
SNC1 expression in cir1 versus PR-1:LUC plants grown at 18 or 22 degrees
Actin							SNC1							SNC1/Act	Mean	SD	SEM
Genotype	Temp	Bio Rep	Tech Rep	Calc conc	Mean		Genotype	Temp	Bio Rep	Tech Rep	Calc conc	Mean
cir1	18	1	1	4.78256			cir1	18	1	1	3.28545
			2	4.93513	4.85884					2	3.22077	3.25311		0.669523
		2	1	6.16284					2	1	4.83754
			2	6.70692	6.43488					2	5.31476	5.07615		0.78885
		3	1	6.17274					3	1	5.23306
			2	5.99238	6.08256					2	4.70014	4.9666		0.816532	0.758302	0.0781202	0.0451027
cir1	22	1	1	5.45637			cir1	22	1	1	5.64866
			2	4.81577	5.13607					2	4.55503	5.10185		0.993336
		2	1	4.48443					2	1	4.76943
			2	4.40163	4.44303					2	4.67861	4.72402		1.06324
		3	1	4.77556					3	1	5.42915
			2	4.79542	4.78549					2	5.77446	5.60181		1.17058	1.07572	0.0892787	0.0515451
PR-1:LUC	18	1	1	5.00236			PR-1:LUC	18	1	1	2.92145
			2	4.96324	4.9828					2	2.85969	2.89057		0.580109
		2	1	4.77959					2	1	2.51422
			2	4.99875	4.88917					2	2.85889	2.68656		0.549491
		3	1	6.7317					3	1	4.52239
			2	6.51657	6.62413					2	4.65283	4.58761		0.69256	0.607387	0.0753341	0.0434942
PR-1:LUC	22	1	1	3.65213			PR-1:LUC	22	1	1	4.27357
			2	3.51245	3.58229					2	4.57345	4.42351		1.23483
		2	1	5.04439					2	1	6.75171
			2	5.41482	5.22961					2	6.37573	6.56372		1.25511
		3	1	4.44481					3	1	5.57574
			2	4.73537	4.59009					2	5.79387	5.68481		1.2385	1.24281	0.0108063	0.00623902
Efficiency	1.00237 (* = 10^(-1/m) - 1)						Efficiency	0.97062 (* = 10^(-1/m) - 1)
M	-3.31626						M	-3.39439
R Value	0.9999						R Value	0.99944
R^2 Value	0.9998						R^2 Value	0.99887
